# Supplementary material for: Regime-based aerosol–cloud interactions from CALIPSO-MODIS and the Energy Exascale Earth System Model version 2 (E3SMv2) over the Eastern North Atlantic
Source: Copernicus journal article supplement (doi:10.5194/acp-25-17473-2025), 2025-12-03
Supplement: Supplementary file 1 [file acp-25-17473-2025-supplement.pdf]

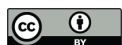

*Supplement of*

**Regime-based aerosol–cloud interactions from CALIPSO-MODIS and the Energy Exascale Earth System Model version 2 (E3SMv2) over the Eastern North Atlantic**

**Xiaojian Zheng et al.**

*Correspondence to:* Xiaojian Zheng (zhengx@anl.gov)

The copyright of individual parts of the supplement might differ from the article licence.

**Table S1. Regime-based precipitation status from Satellite and E3SMv2**

| <b>Mean <math>\pm</math> Std</b>                            | <b>Regime 1</b>    | <b>Regime 2</b>    | <b>Regime 3</b>   | <b>Regime 4</b>     |
|-------------------------------------------------------------|--------------------|--------------------|-------------------|---------------------|
| <b>Satellite (CloudSat)</b>                                 |                    |                    |                   |                     |
| <b>Drizzle*</b><br><b>Fraction (%)</b>                      | 21.09 $\pm$ 22.89  | 21.79 $\pm$ 22.38  | 21.19 $\pm$ 23.35 | 18.73 $\pm$ 20.15   |
| <b>Light Rain**</b><br><b>Fraction (%)</b>                  | 13.50 $\pm$ 19.93  | 11.86 $\pm$ 16.55  | 10.77 $\pm$ 17.55 | 13.75 $\pm$ 18.52   |
| <b>Rain***</b><br><b>Fraction (%)</b>                       | 12.39 $\pm$ 22.96  | 11.85 $\pm$ 21.72  | 7.80 $\pm$ 18.54  | 14.34 $\pm$ 23.71   |
| <b>(Drizzle + Light Rain + Rain)</b><br><b>Fraction (%)</b> | 46.98 $\pm$ 36.11  | 45.49 $\pm$ 35.01  | 39.76 $\pm$ 36.37 | 46.81 $\pm$ 36.02   |
| <b>E3SMv2</b>                                               |                    |                    |                   |                     |
| <b>In-cloud Rain†</b><br><b>Fraction (%)</b>                | 50.25 $\pm$ 29.86  | 42.63 $\pm$ 29.37  | 34.27 $\pm$ 32.58 | 43.81 $\pm$ 26.52   |
| <b>In-cloud Rain LWP (g m2)</b>                             | 84.46 $\pm$ 205.62 | 43.23 $\pm$ 121.03 | 17.99 $\pm$ 95.99 | 118.84 $\pm$ 215.23 |

\*CloudSat drizzle fraction as the number of points with  $-15 \leq \text{maximum dBZ} \leq -7$  and CTH  $< 3$  km divided by total number of CTH  $< 3$  km, within each  $\sim 25$ km domain.

\*\*CloudSat light rain fraction as the number of points with  $-7 \leq \text{maximum dBZ} \leq 0$  and CTH  $< 3$  km divided by total number of CTH  $< 3$  km, within each  $\sim 25$ km domain.

\*\*\*CloudSat rain fraction as the number of points maximum dBZ  $> 0$  and CTH  $< 3$  km divided by total number of CTH  $< 3$  km, within each  $\sim 25$ km domain.

†E3SM fractional rain area within each grid ( $\sim 110$  km).

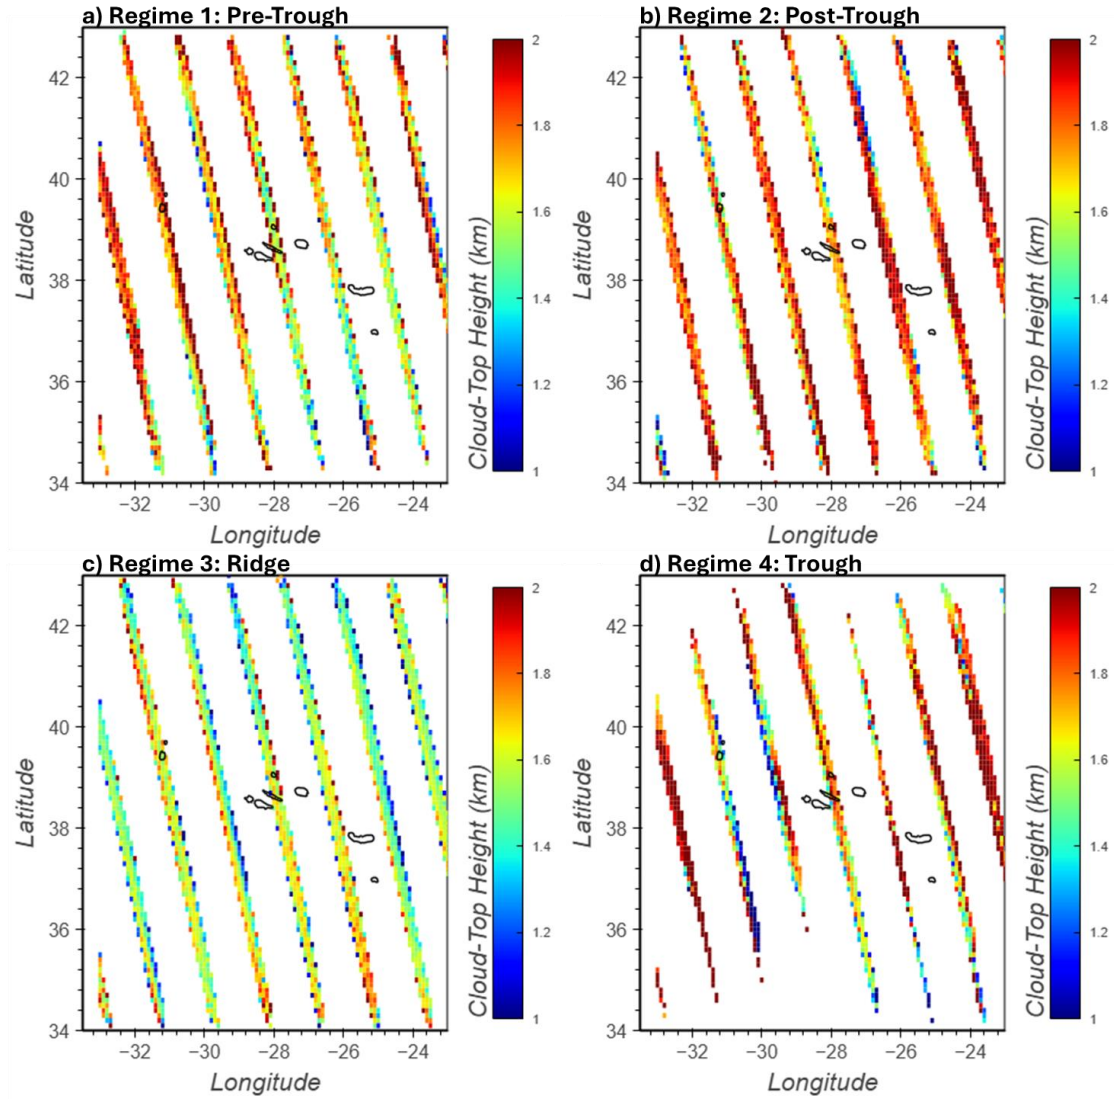

**Figure S1.** Regime-based composite map of cloud-top height derived from satellite (MODIS) for a) Regime 1, b) Regime 2, c) Regime 3 and d) Regime 4. The raw 25km grids along the granule are further aggregated into 100km grid-cells in producing this plot to ensure the composite sample sizes and a better visualization.

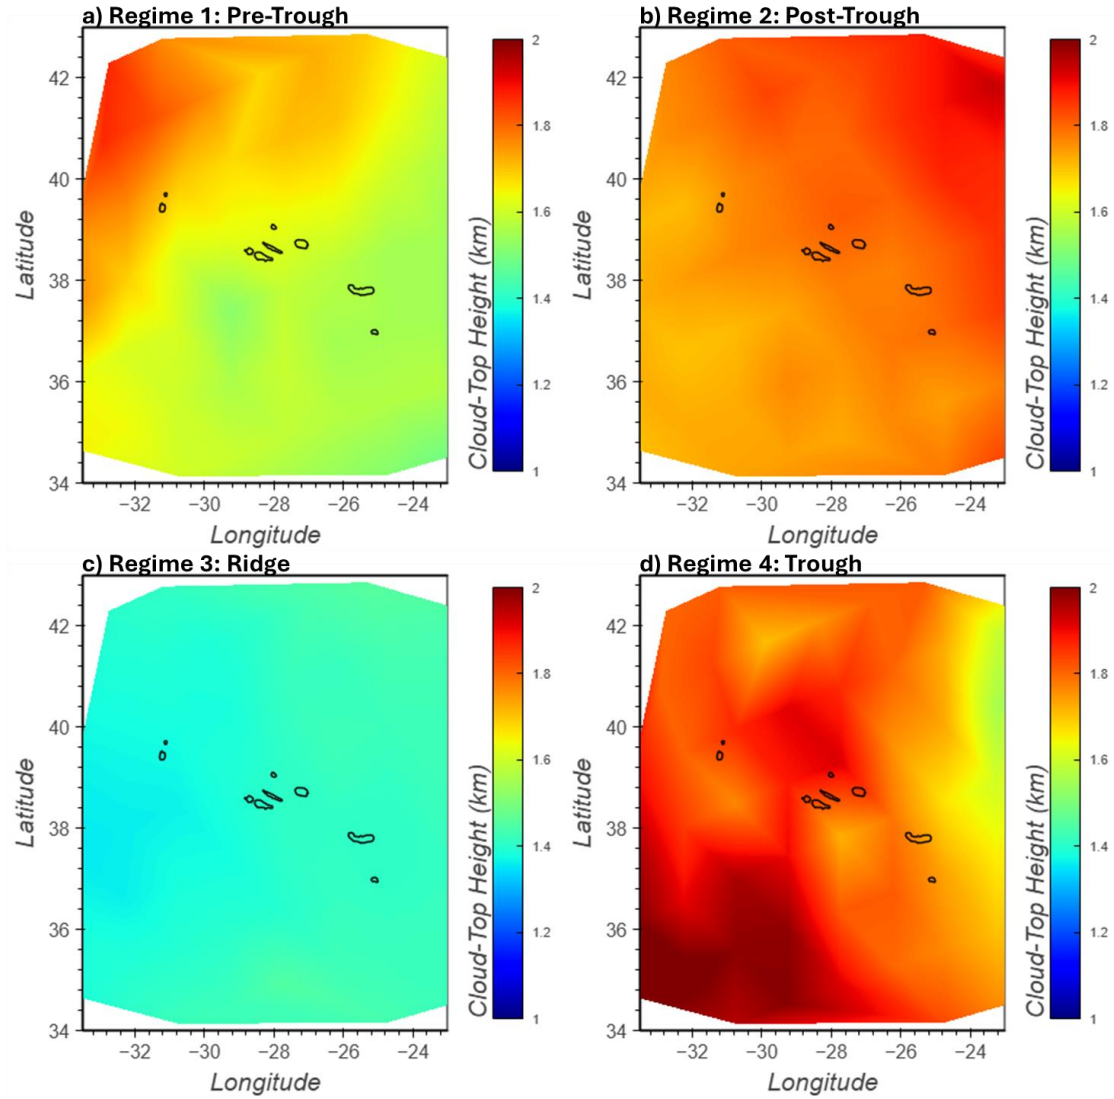

**Figure S2.** Regime-based composite map of cloud-top height derived from E3SMv2 for a) Regime 1, b) Regime 2, c) Regime 3 and d) Regime 4. The raw irregular model grid cell data is triangularly-smoothed and rasterized for better visualization.
